# Supplementary material for: Study of Thermal Effect on the Mechanical Properties of Nylon 610 Nanocomposites with Graphite Flakes That Have Undergone Supercritical Water Treatment at Different Temperatures
Source: MDPI journal article supplement (doi:10.3390/polym14245494), 2022-12-15
Supplement: s1 [file s1]

## Supplementary Materials

This section here illustrates the bar chart included with error bars for the tensile strength and Young's Modulus for all 21 of the nylon 610/graphite flakes polymer nanocomposites. The results shown in the bar charts below are exactly the same as in Figure 2 and 3 in the main research article.

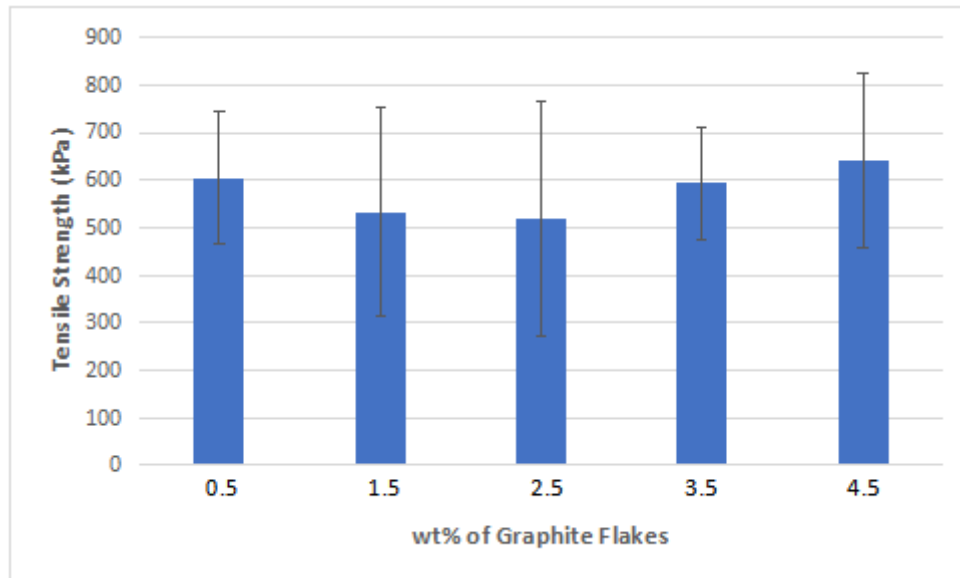

**Figure S1:** Average Tensile Strength of Nylon 610 Nanocomposites with Graphite Flakes Treated at 200 °C & -0.08 MPa

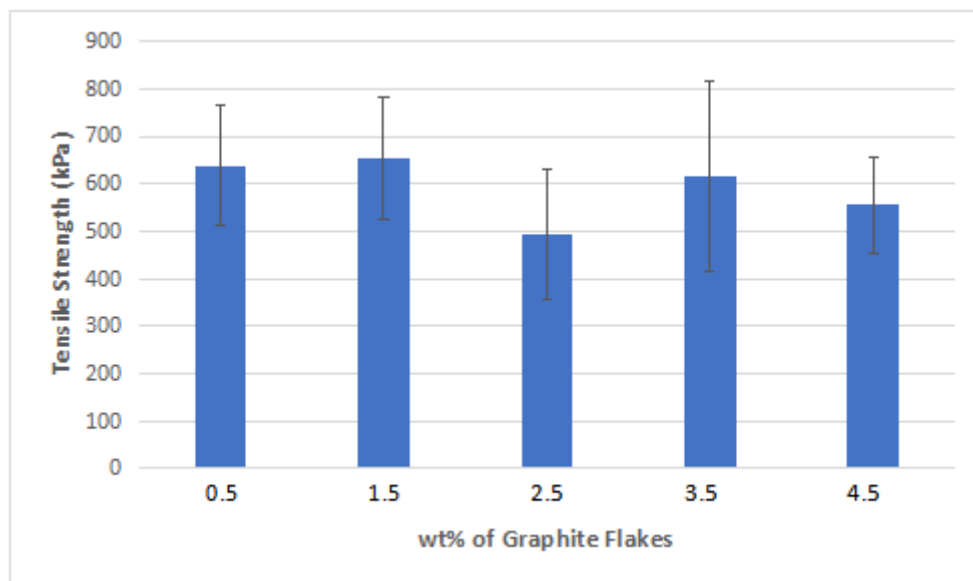

**Figure S2:** Average Tensile Strength of Nylon 610 Nanocomposites with Graphite Flakes Treated at 175 °C & -0.08 MPa

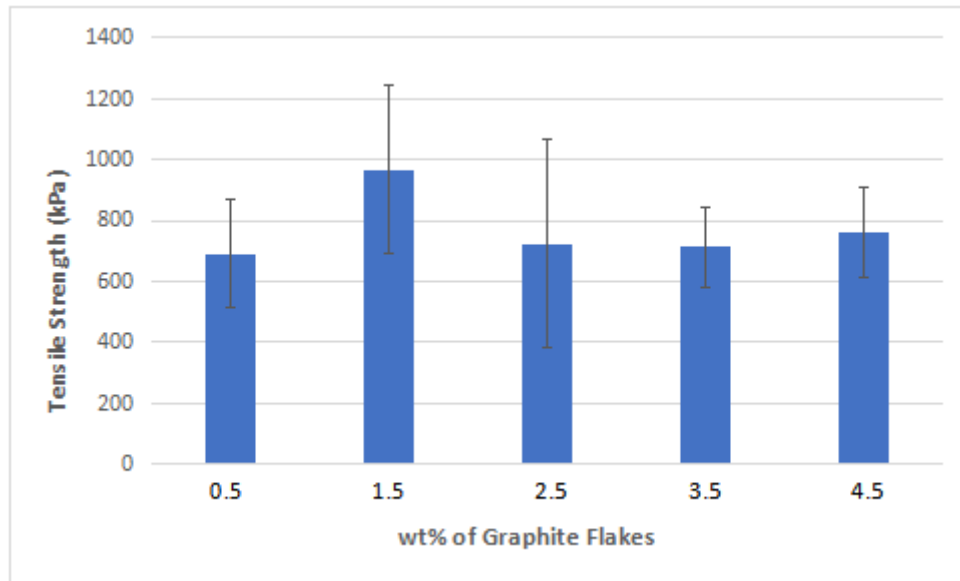

**Figure S3:** Average Tensile Strength of Nylon 610 Nanocomposites with Graphite Flakes Treated at 150 °C & -0.08 MPa

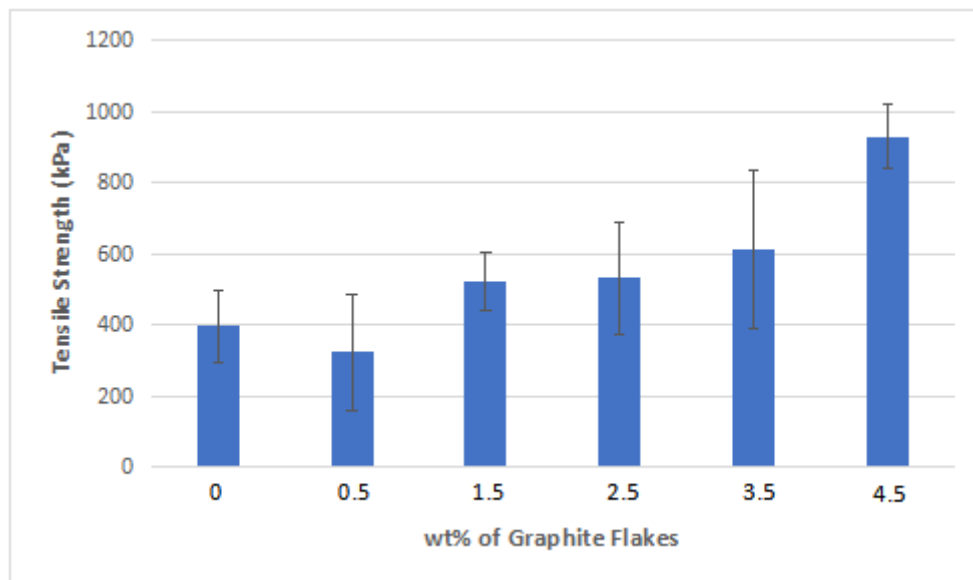

**Figure S4:** Average Tensile Strength of Nylon 610 Nanocomposites with Untreated Graphite Flakes

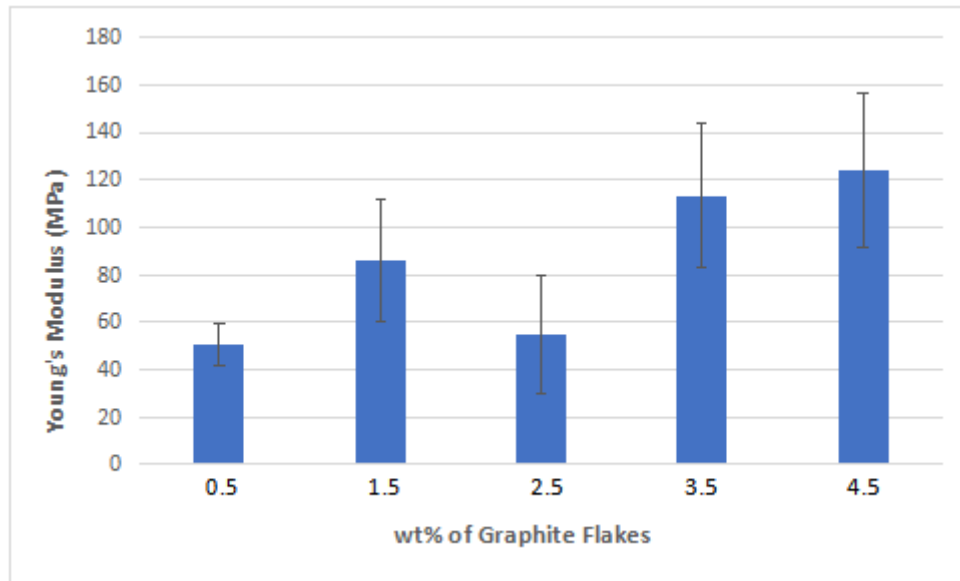

**Figure S5:** Average Young's Modulus of Nylon 610 Nanocomposites with Graphite Flakes Treated at 200 °C & -0.08 MPa

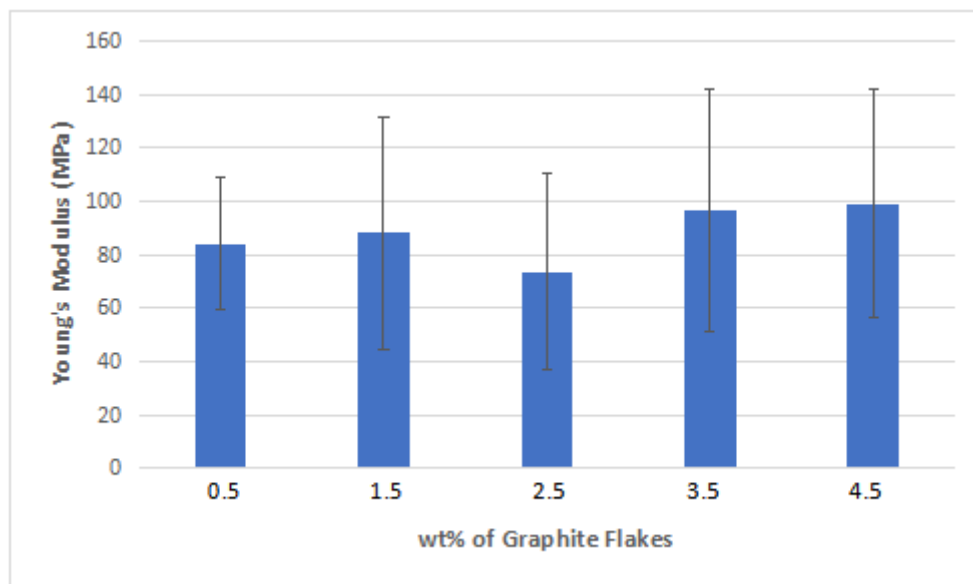

**Figure S6:** Average Young's Modulus of Nylon 610 Nanocomposites with Graphite Flakes Treated at 175 °C & -0.08 MPa

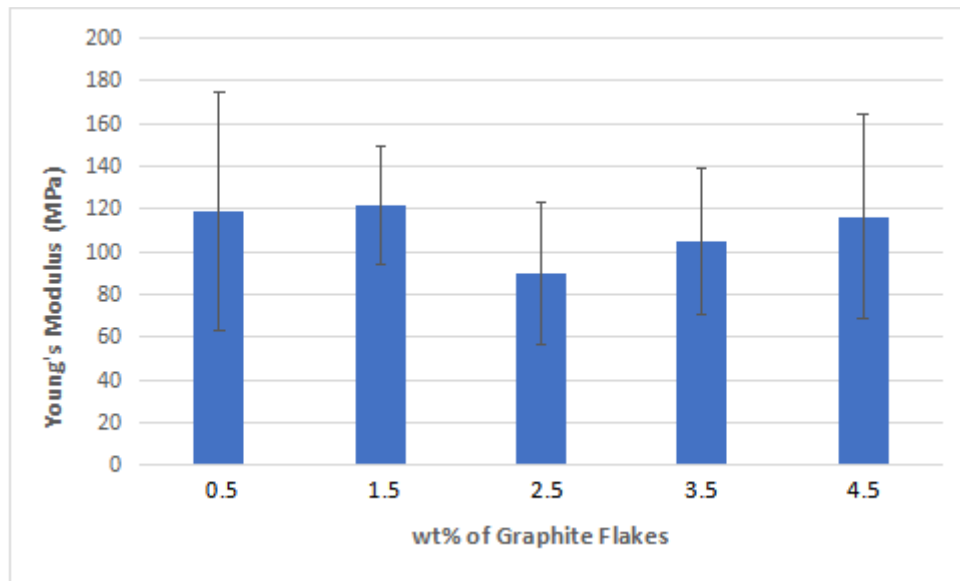

**Figure S7:** Average Young's Modulus of Nylon 610 Nanocomposites with Graphite Flakes Treated at 150 °C & -0.08 MPa

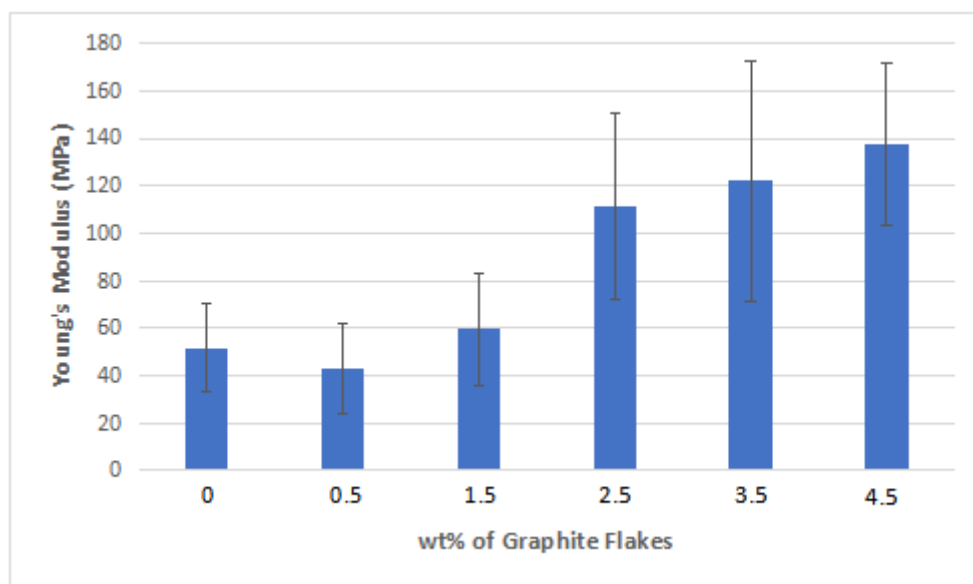

**Figure S8:** Average Young's Modulus of Nylon 610 Nanocomposites with Untreated Graphite Flakes
